# Supplementary material for: Global IP6K1 deletion enhances temperature modulated energy expenditure which reduces carbohydrate and fat induced weight gain
Source: PubMed Central journal article supplement — Mol Metab. 2016 Nov 28;6(1):73–85. doi: 10.1016/j.molmet.2016.11.010 (PMC5220553; doi:10.1016/j.molmet.2016.11.010), 2016-11-28
Supplement: mmc1.pdf [file mmc1.pdf]

Supplementary Figure 1: CD-fed IP6K1-KO mice display enhanced carbohydrate oxidation mediated EE upon fasting/refeeding or following cold exposure

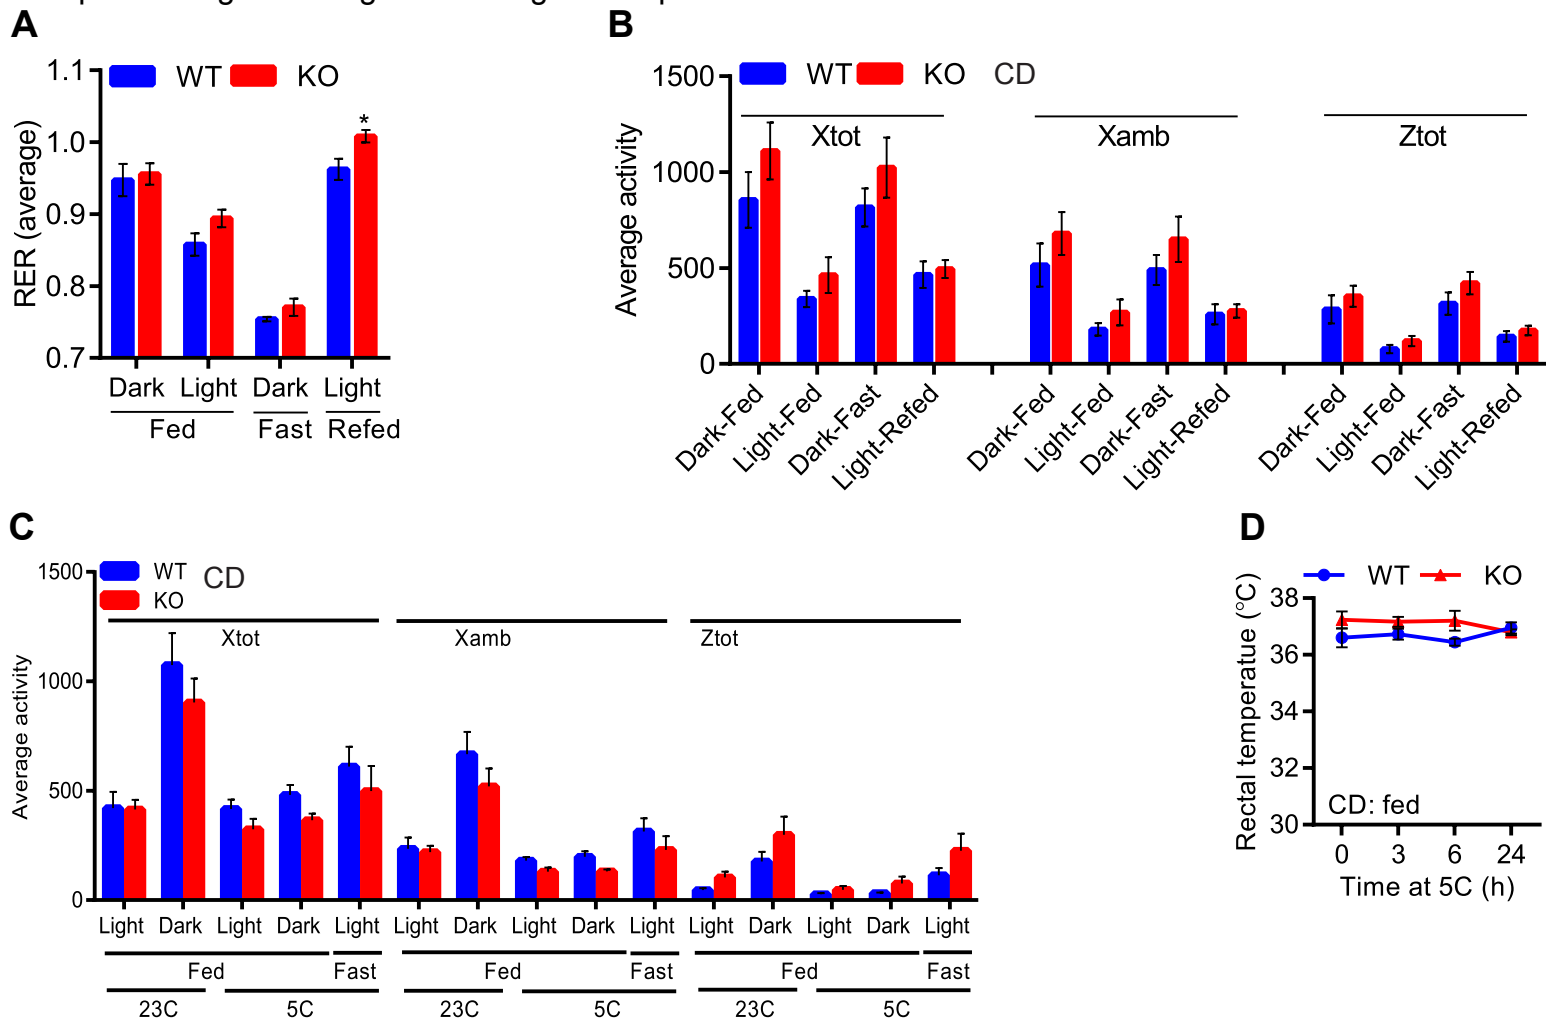

Supplemental Figure 2: Global IP6K1 deletion stimulates adipose tissue browning

**A**

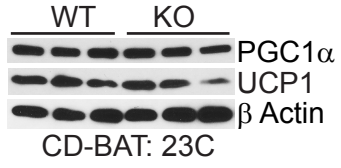

**B**

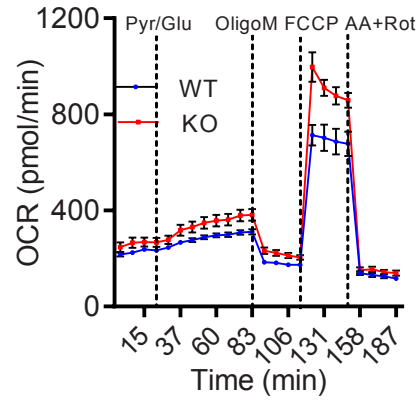

**C**

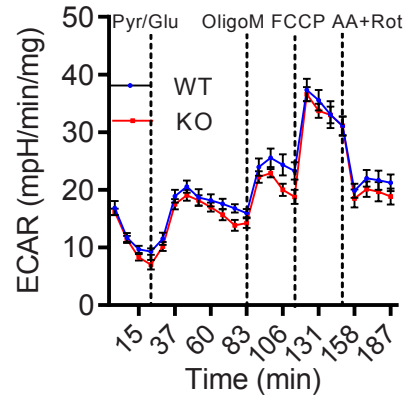

Supplementary Figure 3: HFD-fed IP6K1-KO mice exhibit higher fat oxidation at 23C, albeit switch to carbohydrate oxidation at 5C

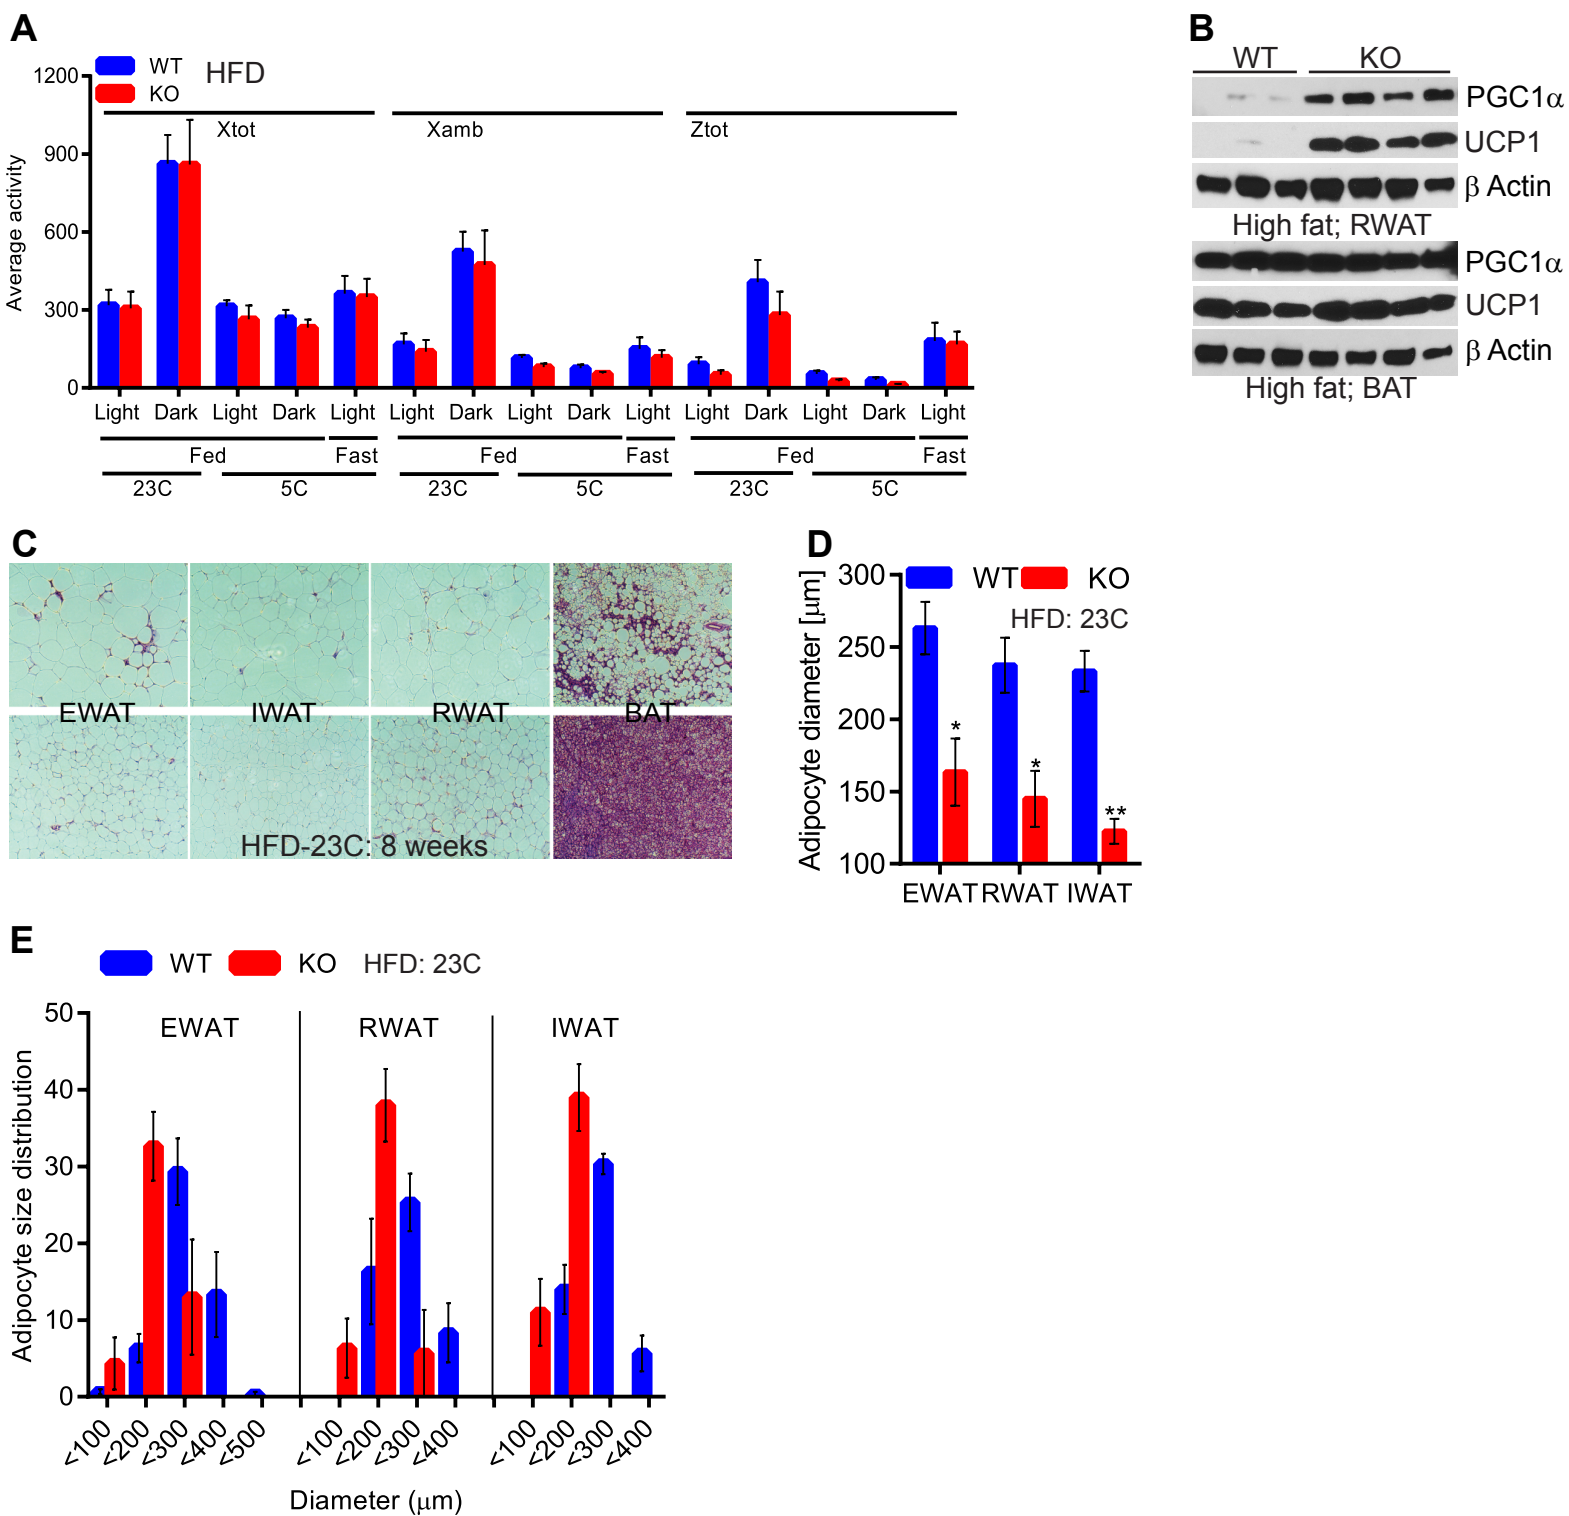

Supplementary Figure 4: Thermoneutrality delays yet, does not abolish the lean phenotype of HFD-fed IP6K1-KO mice

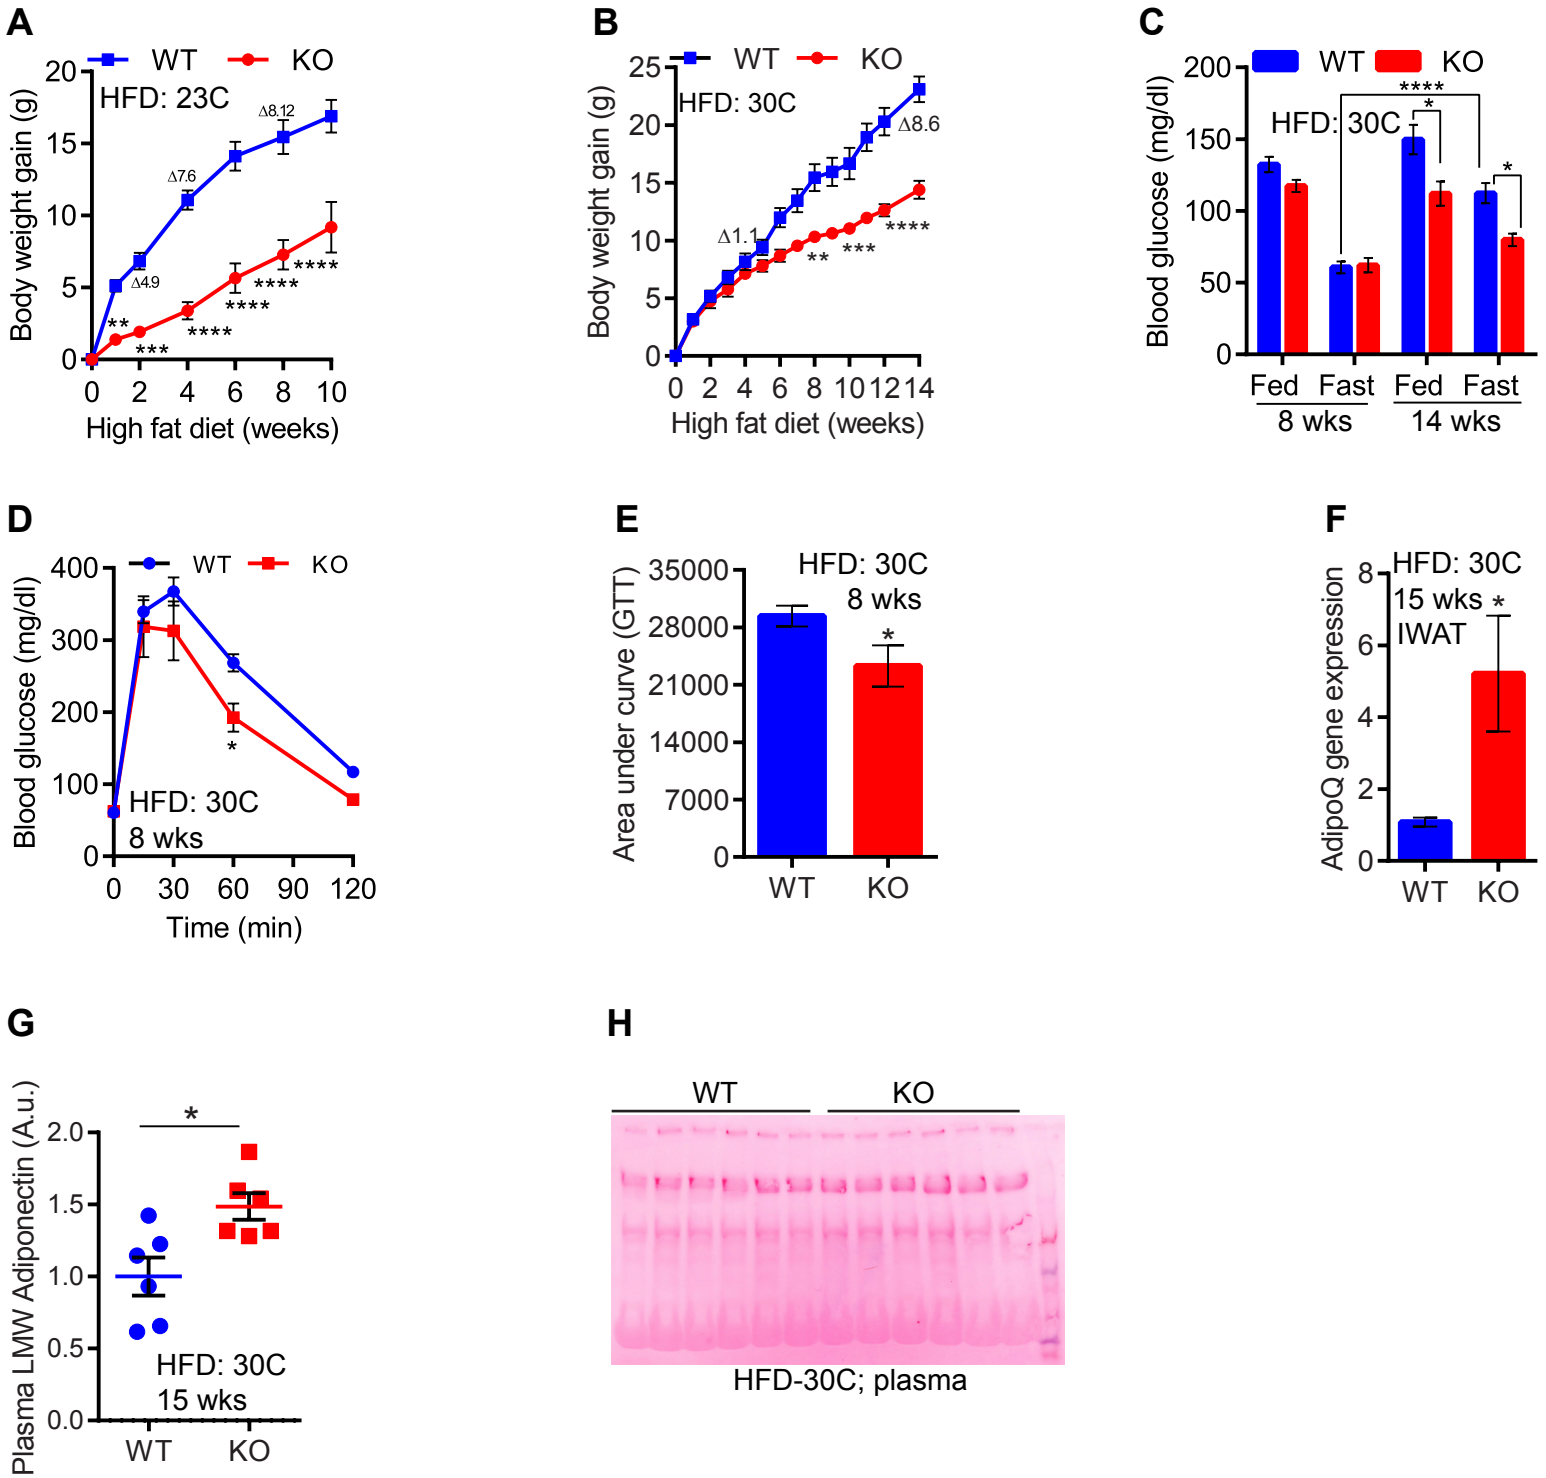

Supplemental Figure 5: HFD-fed IP6K1-KO mice display greater fat oxidation mediated EE at 30C

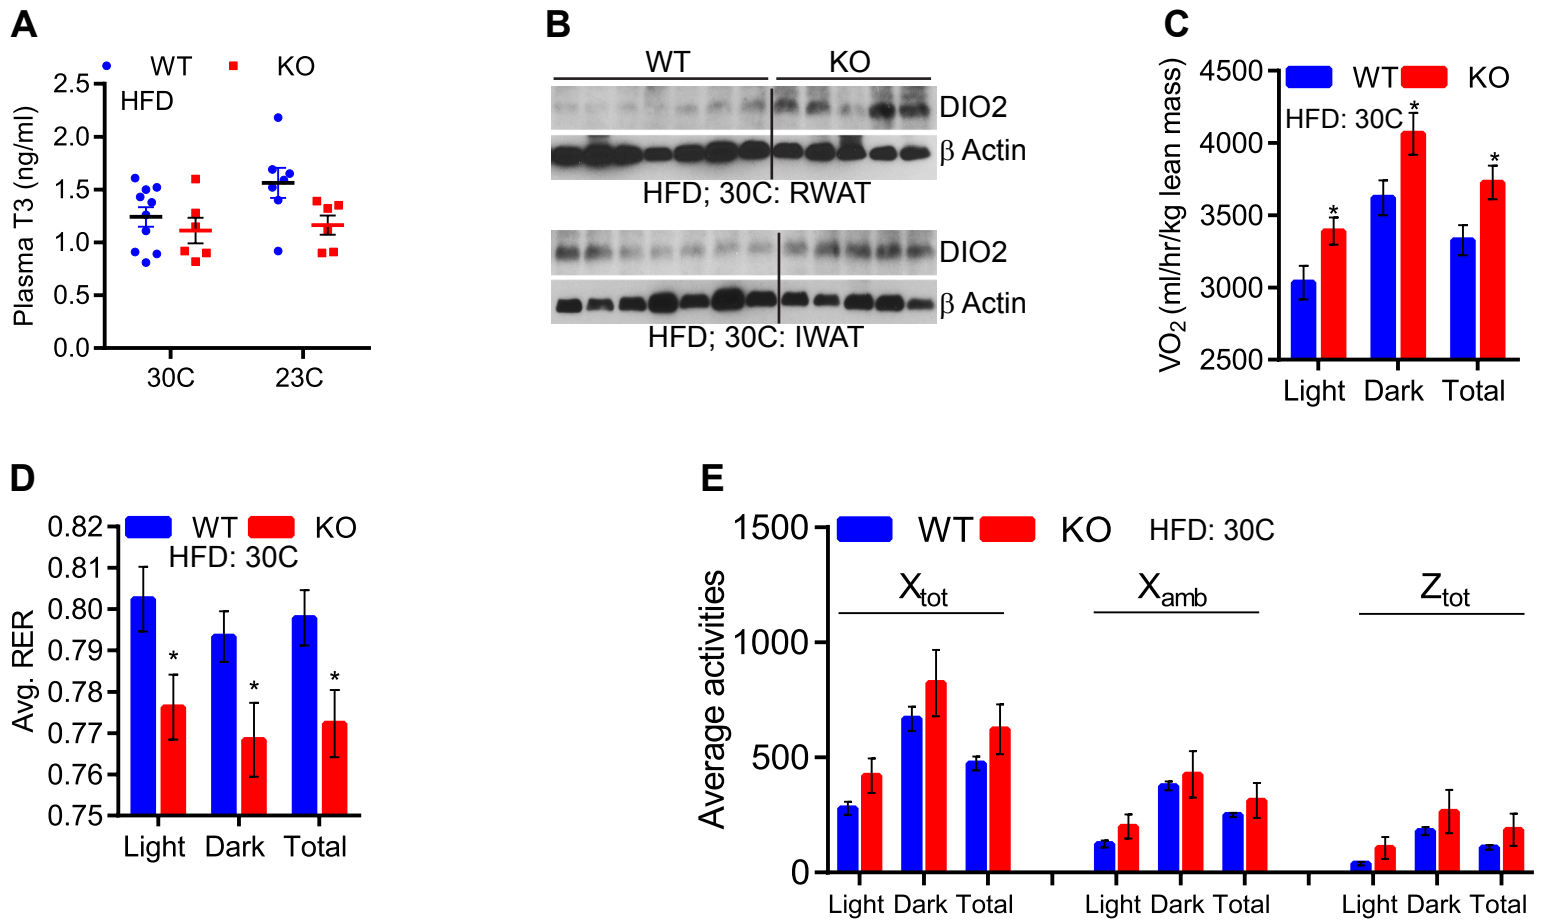

Supplementary Figure 6: IP6K1 enhances cellular fat accumulation by diminishing AMPK mediated energy metabolism

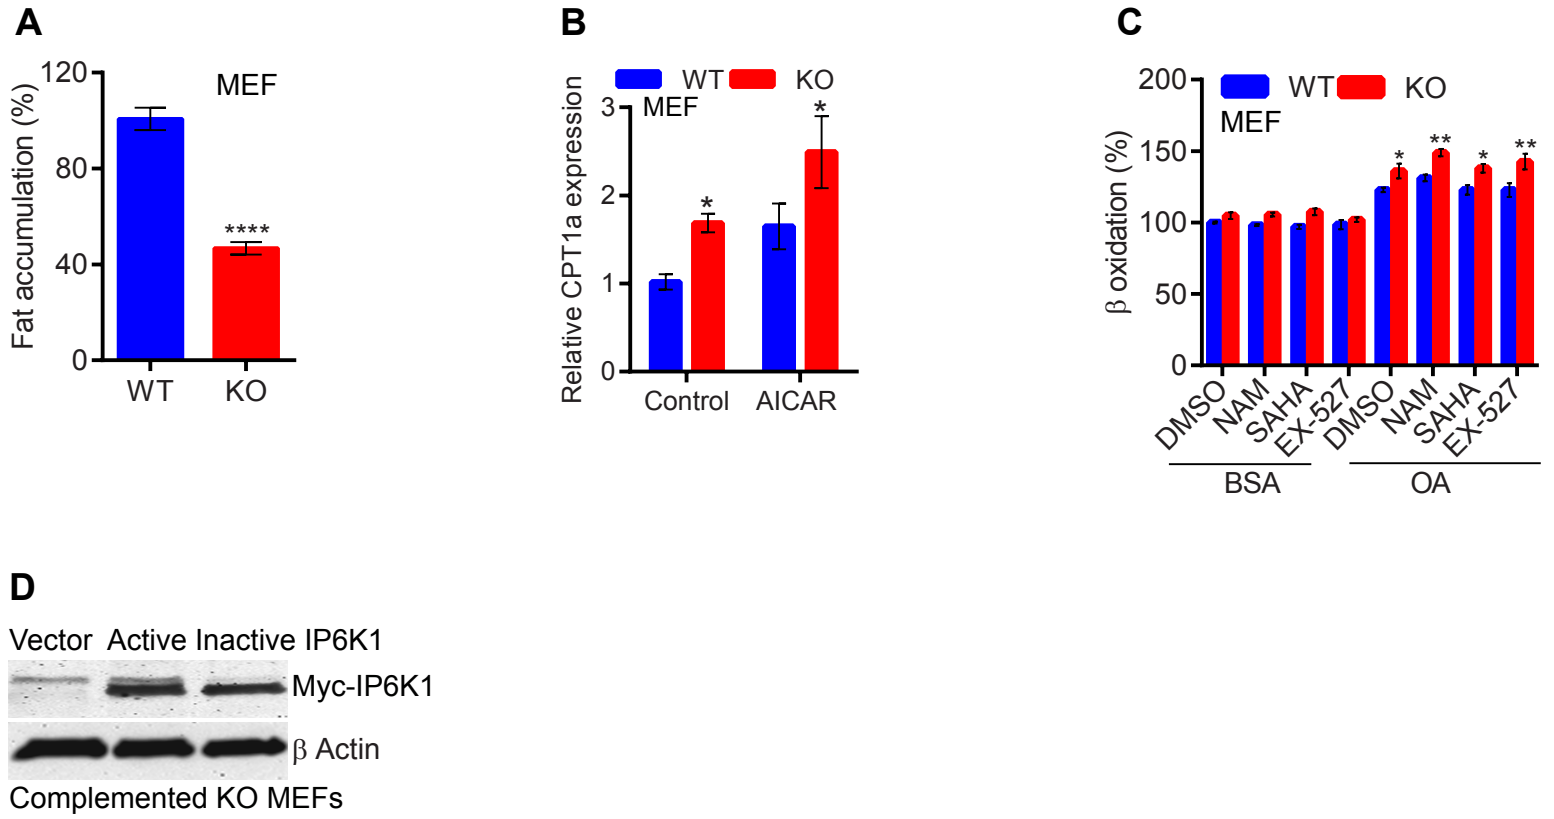

Supplementary Table 1: Food intake in CD-fed mice, under ad libitum and refeeding conditions

| Energy                      | Chow group (n) |                     |
|-----------------------------|----------------|---------------------|
|                             | WT (7)         | KO (9)              |
| Daily intake (kcal)         | 9.16 ± 0.58    | 7.83 ± 0.33         |
| Daily intake (kcal/g BW)    | 0.34± 0.02     | 0.33 ± 0.01         |
| Daily meal size (kcal)      | 1.11± 0.10     | 0.95 ± 0.06         |
| Daily meal number           | 8.64 ± 0.89    | 8.36 ± 0.39         |
| 4h Refed intake (kcal)      | 4.15± 0.67     | 4.79 ± 0.11         |
| 4h Refed intake (kcal/g BW) | 0.15± 0.03     | 0.21± 0.01 (p<0.05) |
| 4h Refed meal size (kcal)   | 1.93 ± 0.32    | 2.31 ± 0.11         |
| 4h Refed meal number        | 2.14 ± 0.26    | 2.11 ± 0.11         |

Supplementary Table 2: Food intake in mice, at the onset of HFD-feeding

| Energy                   | HFD Group (n) |              |
|--------------------------|---------------|--------------|
|                          | WT (9)        | KO (7)       |
| Daily intake (kcal)      | 19.93 ± 2.94  | 19.70 ± 2.42 |
| Daily intake (kcal/g BW) | 0.76 ± 0.12   | 0.85 ± 0.11  |
| Daily meal size (kcal)   | 3.76 ± 0.82   | 4.43 ± 0.92  |
| Daily meal number        | 6.28 ± 0.67   | 5.10 ± 0.57  |
